# Supplementary material
Source: PubMed Central journal article supplement (PMC3780403)
Supplement: NIHMS474533-supplement-1.pdf [file NIHMS474533-supplement-1.pdf]

**Table S1. Equilibrium Dissociation Constant between Individual Cobl-W Domains and Actin, Related to Figure 1**

|          | Cobl-W <sub>a</sub> | Cobl-W <sub>b</sub> |
|----------|---------------------|---------------------|
| WT actin | 2.1 ± 0.9 μM        | 1.1 ± 0.1 μM        |
| Actin I  | 1.5 ± 0.4 μM        | 1.5 ± 1.0 μM        |
| Actin II | 2.0 ± 1.1 μM        | 1.6 ± 0.1 μM        |

The equilibrium dissociation constant  $K_D$  is presented as the mean ± SD from different actin concentrations used to obtain a full range of binding curves.
